# Supplementary material for: G3BP2, a stress granule assembly factor, is dispensable for spermatogenesis in mice
Source: PeerJ. 2022 Jun 28;10:e13532. doi: 10.7717/peerj.13532 (PMC9248785; doi:10.7717/peerj.13532)
Supplement: Supplemental Information 2 [file peerj-10-13532-s002.xlsx]

## Sheet: Sheet1
Apoptotic cells 100 tubules
WT	SKO	DKO
15	91	174
8	113	171
14	84	176
19	133	179
