# Supplementary material for: G3BP2, a stress granule assembly factor, is dispensable for spermatogenesis in mice
Source: PeerJ. 2022 Jun 28;10:e13532. doi: 10.7717/peerj.13532 (PMC9248785; doi:10.7717/peerj.13532)
Supplement: Supplemental Information 3 [file peerj-10-13532-s003.xlsx]

## Sheet: Sheet1
1W	2W	3W	4W	5W	Adult
1	0.846745	0.929805	0.965716	0.628507	0.712025
1	0.560583	0.793653	0.812252	0.643941	0.968964
1	0.726681	0.939523	0.796546	1.1607	1.02101
