# Supplementary material for: G3BP2, a stress granule assembly factor, is dispensable for spermatogenesis in mice
Source: PeerJ. 2022 Jun 28;10:e13532. doi: 10.7717/peerj.13532 (PMC9248785; doi:10.7717/peerj.13532)
Supplement: Supplemental Information 4 [file peerj-10-13532-s004.xlsx]

## Sheet: Sheet1
offspring/litter
WT	SKO	DKO
6	6	6
7	6	5
5	5	4
5	6	5
6	5	5
5	6	6
6	7	5
4	4	6
