# Supplementary material for: G3BP2, a stress granule assembly factor, is dispensable for spermatogenesis in mice
Source: PeerJ. 2022 Jun 28;10:e13532. doi: 10.7717/peerj.13532 (PMC9248785; doi:10.7717/peerj.13532)
Supplement: Supplemental Information 5 [file peerj-10-13532-s005.xlsx]

## Sheet: Sheet1
Sperm motility（%）
WT	SKO	DKO
55	47	46
53	50	54
60	51	49
52	48	46
44	46	53
50	47	43
