# Supplementary material for: G3BP2, a stress granule assembly factor, is dispensable for spermatogenesis in mice
Source: PeerJ. 2022 Jun 28;10:e13532. doi: 10.7717/peerj.13532 (PMC9248785; doi:10.7717/peerj.13532)
Supplement: Supplemental Information 7 [file peerj-10-13532-s007.xlsx]

## Sheet: Sheet1
WT（mg/g）	DKO（mg/g）	DKO（mg/g）
3.16	3.16	3.21
3.21	2.97	2.95
3.07	3.1	2.98
3.31	2.86	3.13
2.87	3.22	3.15
