# Supplementary material for: G3BP2, a stress granule assembly factor, is dispensable for spermatogenesis in mice
Source: PeerJ. 2022 Jun 28;10:e13532. doi: 10.7717/peerj.13532 (PMC9248785; doi:10.7717/peerj.13532)
Supplement: Supplemental Information 10 [file peerj-10-13532-s010.xlsx]

## Sheet: Sheet1
Organism expression
Heart	Liver	Spleen	Lung	Kidney	Brain	Ovary	Testis
1	0.82645	44.0173	15.8345	0.76313	91.7731	5.22344	91.4556
1	0.641713	29.2426	9.84916	0.432269	154.343	4.48466	72.7563
1	0.913831	42.2243	13.595	0.697372	337.794	5.75573	152.747
