# Supplementary material for: G3BP2, a stress granule assembly factor, is dispensable for spermatogenesis in mice
Source: PeerJ. 2022 Jun 28;10:e13532. doi: 10.7717/peerj.13532 (PMC9248785; doi:10.7717/peerj.13532)
Supplement: Supplemental Information 12 [file peerj-10-13532-s012.xlsx]

## Sheet: Sheet1
WT	SKO	DKO
15	15	15
21	16	10
14	15	10
12	14	11
20	10	13
15	12	13
13	10	14
16	14	13
14	14	15
16	20	12
16	16	18
25	22	15
9	15	11
12	14	19
14	15	16
16	14	17
13	16	17
17	13	12
16	16	16
16	14	14
