# Supplementary material for: G3BP2, a stress granule assembly factor, is dispensable for spermatogenesis in mice
Source: PeerJ. 2022 Jun 28;10:e13532. doi: 10.7717/peerj.13532 (PMC9248785; doi:10.7717/peerj.13532)
Supplement: Supplemental Information 13 [file peerj-10-13532-s013.xlsx]

## Sheet: Sheet1
Sperm concentration（X106）
WT	SKO	DKO
9.6	9.5	9.4
8.5	8.6	8.7
9.4	7.5	6.8
10.06	10.32	7.9
8.1	8.3	7.8
10.67	9.9	9.09
10.4	8.36	8.37
