# Supplementary material for: G3BP2, a stress granule assembly factor, is dispensable for spermatogenesis in mice
Source: PeerJ. 2022 Jun 28;10:e13532. doi: 10.7717/peerj.13532 (PMC9248785; doi:10.7717/peerj.13532)
Supplement: Supplemental Information 15 [file peerj-10-13532-s015.xlsx]

## Sheet: Sheet1
WT	SKO	DKO
64	49	52
48	49	57
52	60	52
55	60	49
57	45	51
59	52	45
57	53	51
51	50	50
53	56	56
50	52	52
47	54	55
56	56	62
51	58	60
48	61	49
59	49	47
47	47	52
45	51	53
55	55	57
51	53	56
52	47	48
